# Supplementary material for: Effect of coatings on the green electrode processing and cycling behaviour of LiCoPO4
Source: Royal Society of Chemistry journal article supplement (doi:10.1039/c6ta05262b), 2016-01-01
Supplement: c6ta05262b1.pdf [file c6ta05262b1.pdf]

## Supplementary information

### Effect of coating on the electrochemical performance of $\text{LiCoPO}_4$ for green electrode processing

Nina Laszczynski<sup>a,b,c</sup>, Agnese Birrozzini<sup>a,b</sup>, Krzysztof Maranski<sup>d</sup>, Mark Copley<sup>d</sup>, Manfred Erwin Schuster<sup>d</sup>, Stefano Passerini<sup>\*,a,b</sup>

<sup>a</sup>Helmholtz Institute Ulm (HIU), Helmholtzstr. 11, 89081, Ulm, Germany

<sup>b</sup>Karlsruhe Institute of Technology (KIT), P.O. Box 3640, 76021 Karlsruhe, Germany

<sup>c</sup>Institute of Physical Chemistry, University of Muenster, Corrensstr. 28/30, 48149 Muenster, Germany

<sup>d</sup>Johnson Matthey Technology Centre, Blount's Court Road, Sonning Common, Reading, RG4 9NH, UK

Table S 1. Output of Rietveld Refinement of uncoated and coated LCP using Topas 4.2.

|                                                                                                                                                                                                                                                                                                                                     | LCP                        | LCP-C1     | LCP-C2     | LCP-C3     | LCP-C4     | LCP-V      |
|-------------------------------------------------------------------------------------------------------------------------------------------------------------------------------------------------------------------------------------------------------------------------------------------------------------------------------------|----------------------------|------------|------------|------------|------------|------------|
| R <sub>exp</sub>                                                                                                                                                                                                                                                                                                                    | 4.80                       | 5.36       | 3.89       | 4.25       | 4.46       | 4.96       |
| R <sub>wp</sub>                                                                                                                                                                                                                                                                                                                     | 5.30                       | 5.65       | 4.35       | 4.60       | 4.59       | 5.34       |
| R <sub>p</sub>                                                                                                                                                                                                                                                                                                                      | 4.20                       | 4.48       | 3.44       | 3.66       | 3.64       | 4.26       |
| GOF                                                                                                                                                                                                                                                                                                                                 | 1.10                       | 1.05       | 1.12       | 1.08       | 1.03       | 1.08       |
| DW                                                                                                                                                                                                                                                                                                                                  | 1.70                       | 1.82       | 1.67       | 1.75       | 1.89       | 1.72       |
| Refinement range (2θ): 10-80°; LP factor: 0; Order of background parameter (Chebichev polynomial): 15                                                                                                                                                                                                                               |                            |            |            |            |            |            |
| Specimen displacement (mm)                                                                                                                                                                                                                                                                                                          | -0.243(2)                  | -0.154(2)  | -0.232(2)  | -0.297(3)  | -0.339(3)  | -0.127(1)  |
| <b>Phase 1</b>                                                                                                                                                                                                                                                                                                                      | <b>LiCoPO<sub>4</sub></b>  |            |            |            |            |            |
| B <sub>eq</sub> ** (Å <sup>2</sup> )                                                                                                                                                                                                                                                                                                | 4.4(1)                     | 5.6(1)     | 6.3(1)     | 5.8(1)     | 3.8(1)     | 5.9(1)     |
| R-Bragg                                                                                                                                                                                                                                                                                                                             | 1.861                      | 2.164      | 2.544      | 1.674      | 1.206      | 2.914      |
| Space group                                                                                                                                                                                                                                                                                                                         | <i>Pnma</i> (62)           |            |            |            |            |            |
| Lattice parameter                                                                                                                                                                                                                                                                                                                   |                            |            |            |            |            |            |
| a (Å)                                                                                                                                                                                                                                                                                                                               | 10.2069(3)                 | 10.2064(4) | 10.2052(3) | 10.2005(5) | 10.2061(6) | 10.2054(2) |
| b (Å)                                                                                                                                                                                                                                                                                                                               | 5.9231(2)                  | 5.9229(2)  | 5.9242(2)  | 5.9328(3)  | 5.9313(3)  | 5.9221(1)  |
| c (Å)                                                                                                                                                                                                                                                                                                                               | 4.7011(2)                  | 4.7006(2)  | 4.7011(2)  | 4.7043(3)  | 4.7049(3)  | 4.7004(1)  |
| Crystallite size                                                                                                                                                                                                                                                                                                                    |                            |            |            |            |            |            |
| Lorentzian (nm)                                                                                                                                                                                                                                                                                                                     | 190(7)                     | 127(5)     | 120(3)     | 96(3)      | 131(10)    | 210(6)     |
| Gaussian (nm)                                                                                                                                                                                                                                                                                                                       | 145(5)                     | 109(5)     | 136(6)     | 108(6)     | 59(2)      | 279(17)    |
| <b>Phase 2</b>                                                                                                                                                                                                                                                                                                                      | <b>Co<sub>2</sub>P</b>     |            |            |            |            |            |
| B <sub>eq</sub> ** (Å <sup>2</sup> )                                                                                                                                                                                                                                                                                                | =B <sub>eq</sub> (Phase 1) |            |            |            |            |            |
| R-Bragg                                                                                                                                                                                                                                                                                                                             | 0.310                      | 0.607      | 0.514      | 1.139      | 0.746      | 0.296      |
| Space group                                                                                                                                                                                                                                                                                                                         | <i>Pnma</i> (62)           |            |            |            |            |            |
| Lattice parameter                                                                                                                                                                                                                                                                                                                   |                            |            |            |            |            |            |
| a (Å)                                                                                                                                                                                                                                                                                                                               | 5.63(7)                    | 5.64(5)    | 5.652(6)   | 5.659(6)   | 5.666(5)   | 5.65(9)    |
| b (Å)                                                                                                                                                                                                                                                                                                                               | 3.52(4)                    | 3.52(3)    | 3.511(4)   | 3.511(4)   | 3.510(3)   | 3.50(6)    |
| c (Å)                                                                                                                                                                                                                                                                                                                               | 6.66(8)                    | 6.61(6)    | 6.610(7)   | 6.609(7)   | 6.611(6)   | 6.6(1)     |
| Crystallite size                                                                                                                                                                                                                                                                                                                    |                            |            |            |            |            |            |
| Lorentzian (nm)*                                                                                                                                                                                                                                                                                                                    | 50                         |            |            |            |            |            |
| Gaussian (nm)*                                                                                                                                                                                                                                                                                                                      | 50                         |            |            |            |            |            |
| Phase 1 (%)                                                                                                                                                                                                                                                                                                                         | 99.7(2)                    | 99.6(2)    | 97.4(2)    | 96.6(2)    | 95.9(2)    | 99.8(2)    |
| Phase 2 (%)                                                                                                                                                                                                                                                                                                                         | 0.3(2)                     | 0.4(2)     | 2.6(2)     | 3.4(2)     | 4.1(2)     | 0.2(2)     |
| *fixed parameter                                                                                                                                                                                                                                                                                                                    |                            |            |            |            |            |            |
| **B <sub>eq</sub> was simultaneously refined for all atoms set to the same value of B <sub>eq</sub>                                                                                                                                                                                                                                 |                            |            |            |            |            |            |
| The initial structural models used for the Rietveld refinement were taken from the data of F. Kubel, Zeitschrift für Kristallographie - Crystalline Materials 209 (1994), 755 (ICSD 400625) for phase 1 (LiCoPO <sub>4</sub> ) and S. Rundqvist, Acta Chem. Scan, 14 (1960) 1961-1979 (ICSD 43685) for phase 2 (Co <sub>2</sub> P). |                            |            |            |            |            |            |

Table S2. Results of impedance spectroscopy fitting for uncoated and coated LCP electrodes at 4.8 V of discharge during the 112th cycle using ZView 2 applying an equivalent circuit model.

|                               | LCP       | LCP/C1   | LCP/C2   | LCP/V    |
|-------------------------------|-----------|----------|----------|----------|
| <b>112<sup>th</sup> cycle</b> |           |          |          |          |
| $\chi^2$                      | 0.0064398 | 0.009176 | 0.007447 | 0.000409 |
| $R_s$                         | 9.80      | 7.99     | 7.04     | 2.286    |
| $R_s$ (error)                 | 0.329     | 0.465    |          | 0.066    |
| $R_1$                         | 26.93     | 10.54    | 10.56    | 23.31    |
| $R_1$ (error)                 | 0.558     | 0.583    | 0.165    | 5.574    |
| $CPE_{1-T}$                   | 5.5E-06   | 5.0E-06  | 4.0E-06  | 3.9E-05  |
| $CPE_{1-T}$ (error)           | 0.021     | 0.046    | 0.021    | 0.028    |
| $CPE_{1-P}$                   | 0.74      | 0.75     | 0.81     | 0.66     |
| $CPE_{1-P}$ (error)           | 2.8       | 6.1      | 2.5      | 4.2      |
| $R_2$                         |           |          |          | 241.4    |
| $R_2$ (error)                 |           |          |          | 4.9      |
| $CPE_{2-T}$                   |           |          |          | 0.00011  |
| $CPE_{2-T}$ (error)           |           |          |          | 0.000008 |
| $CPE_{2-P}$                   |           |          |          | 0.59     |
| $CPE_{2-P}$ (error)           |           |          |          | 0.019    |
| $CPE_{w-T}$                   | 0.005     | 0.007    | 0.009    | 0.0016   |
| $CPE_{w-T}$ (error)           | 0.000048  | 0.000067 | 0.000087 | 0.000017 |
| $CPE_{w-P}$                   | 0.59      | 0.53     | 0.57     | 0.45     |
| $CPE_{w-P}$ (error)           | 0.004     | 0.004    | 0.004    | 0.004    |

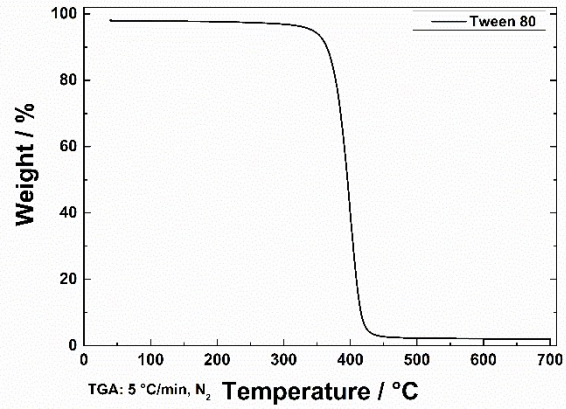

Figure S1. TGA of Tween 80® in N<sub>2</sub> atmosphere.

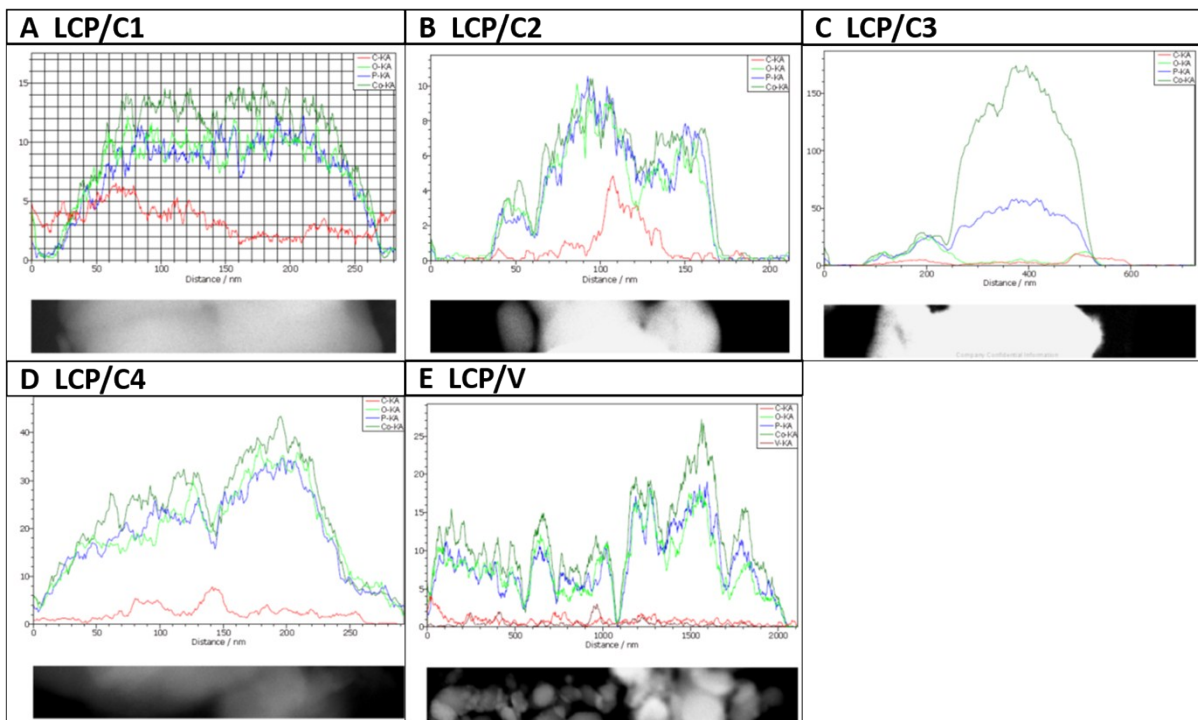

Figure S2. EDX line scan of LCP with different coatings: A LCP/C1 (sucrose), B LCP/C2 (sucrose), C LCP/C3 (PAA), D LCP/C4 (Tween 80), E LCP/V (V<sub>2</sub>O<sub>5</sub>).

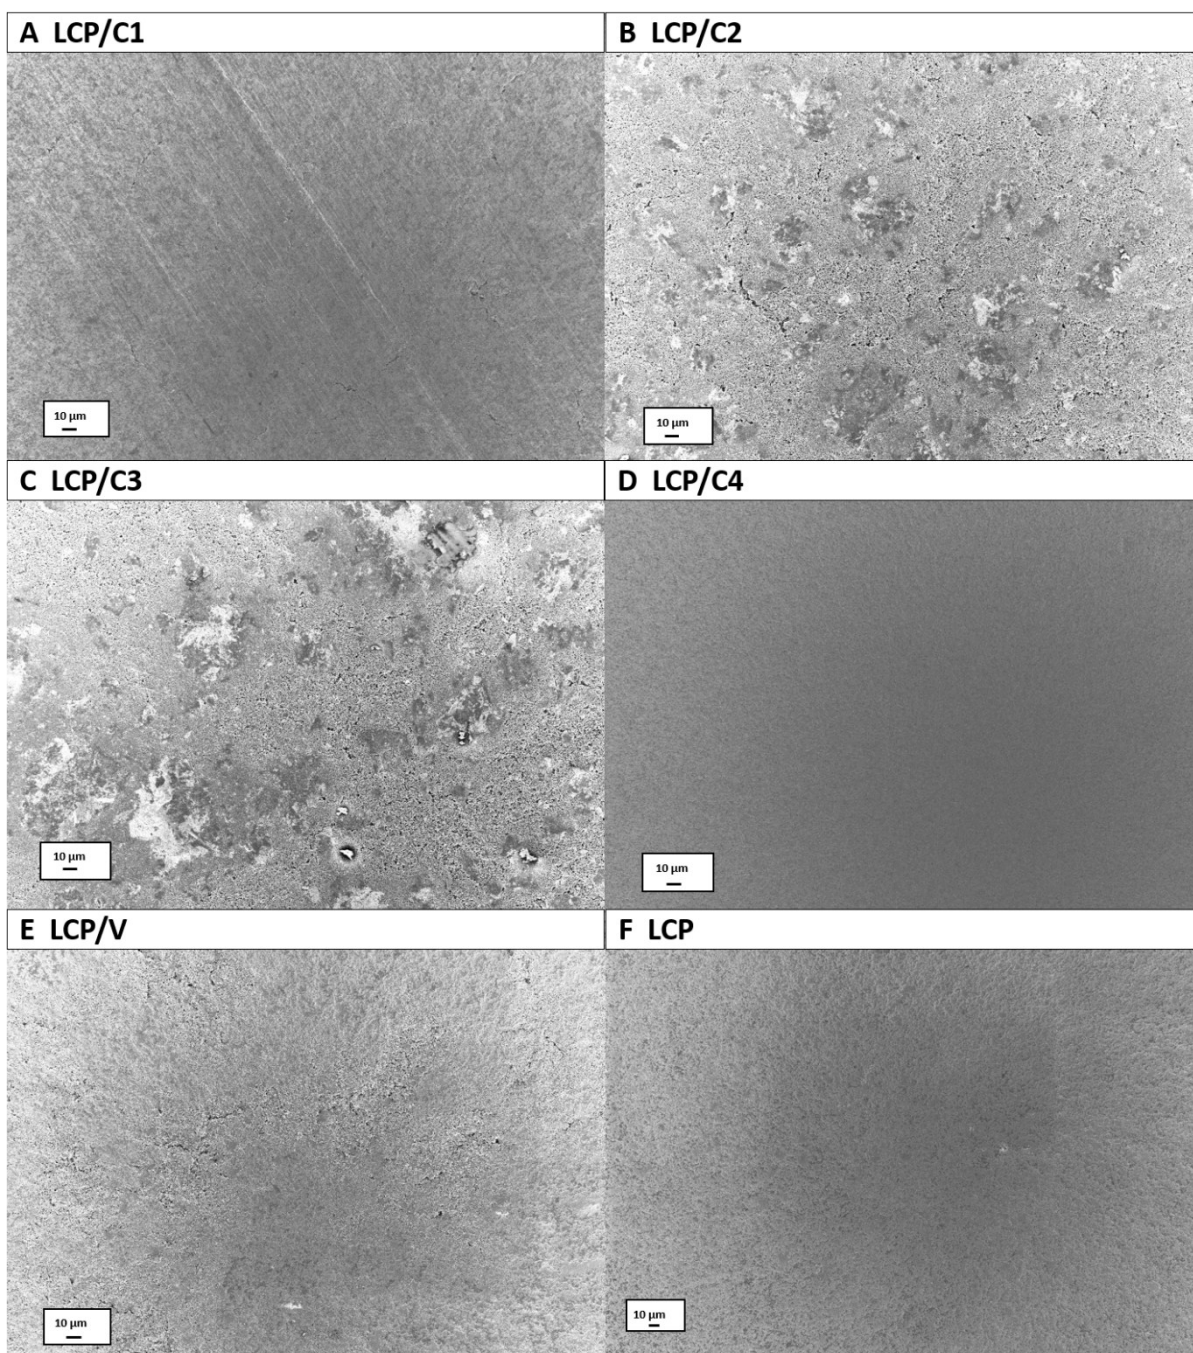

Figure S3. SEM images of electrodes with pristine and coated LCP A: 20 wt.% sucrose, B: 10 wt.% sucrose, C: 20 wt.% polyacrylic acid, D: 40 wt.% Tween 80®, E: 3 wt.%  $V_2O_5$ , F: pristine LCP.

The morphology of pristine and coated LCP electrodes made using the aqueous binder (CMC), subsequently pressed to reduce the porosity was also investigated by SEM (Figure S3). Pristine LCP, LCP/C1 and LCP/C4 (A, D, F) showed very smooth and homogeneous electrode surfaces. On the other hand, some agglomerates and cracks were detected for LCP/C2 (B) while LCP/C3 (C) showed a very inhomogeneous distribution of active material and conductive carbon along with a large amount of agglomerates. LCP/V (E) showed some cracks, but an overall smooth electrode surface and no major inhomogeneities due to active material particles' agglomeration.[14]

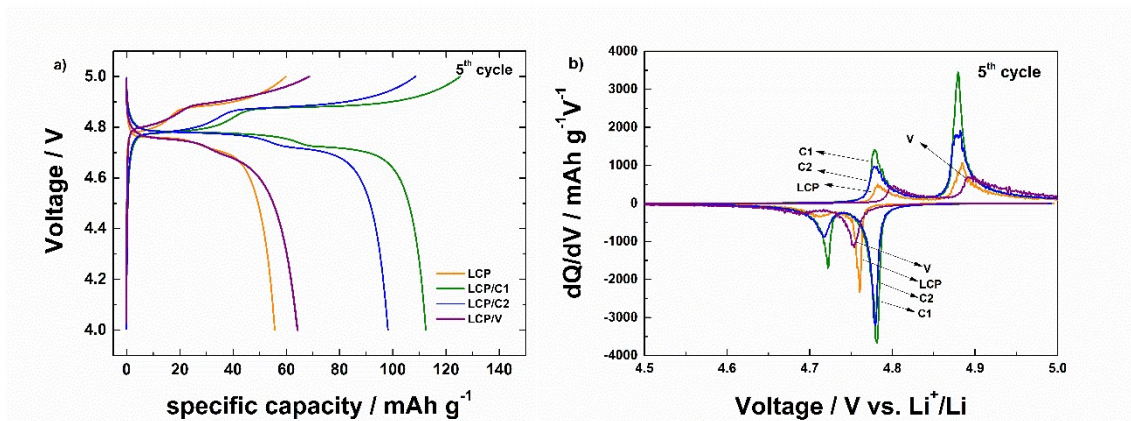

Figure S4. a) Voltage profile and b) differential capacity plot of uncoated and coated LCP (selected materials) during the 5<sup>th</sup> cycle (C/10).
